# Supplementary material for: Iridoid glycoside isolated from Wendlandia glabrata and the role of its enriched fraction in regulating AMPK/PEPCK/G6Pase signaling pathway of hepatic gluconeogenesis
Source: Royal Society of Chemistry journal article supplement (doi:10.1039/d1nj05856h), 2022-01-01

## Iridoid glycoside isolated from *Wendlandia glabrata* and the role of its enriched fraction in regulating AMPK/PEPCK/G6Pase signaling pathway of hepatic gluconeogenesis

Pranamika Sarma<sup>1,2</sup>, Simanta Bharadwaj<sup>1</sup>, Deepsikha Swargiary<sup>1,3</sup>, Semim Akhtar Ahmed<sup>1,3</sup>, Yunus Sheikh<sup>1</sup>, Sagar Ramrao Barge<sup>1</sup>, Prasenjit Manna<sup>3,4</sup>, Narayan Chandra Talukdar<sup>1,5</sup>, Jayanta Bora<sup>6</sup>, Jagat Chandra Borah<sup>1,3</sup>\*

New Journal of Chemistry

Manuscript ID NJ-ART-12-2021-005856.R2

### Supplementary Data :

**Supplementary S1. Effect of the WG Crude methanol extract on the cell viability in palmitate (designated as free fatty acid, FFA) treated hepatocytes.**

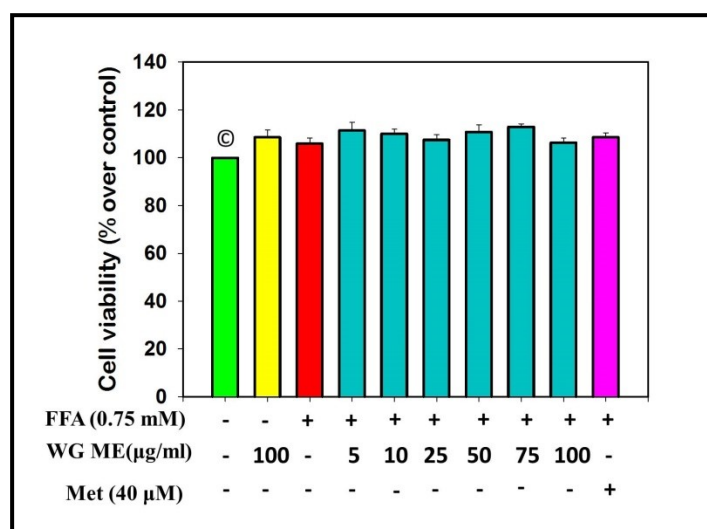

**Supplementary S2. Effect of the WG A) Crude methanol extract B) Ethyl acetate fraction C) *n*-Butanol fraction D) Enriched fraction on Glucose uptake in palmitate (PA) treated hepatocytes. Cells were pre-treated with different concentrations (0.5-5 µg/mL for 2 h followed by PA (0.75 mM) exposure for the next 18 h. “#” denotes the significant difference from untreated/control (p# < 0.05) and “\*” denotes the significant difference from PA-treated groups (p\* < 0.05).**

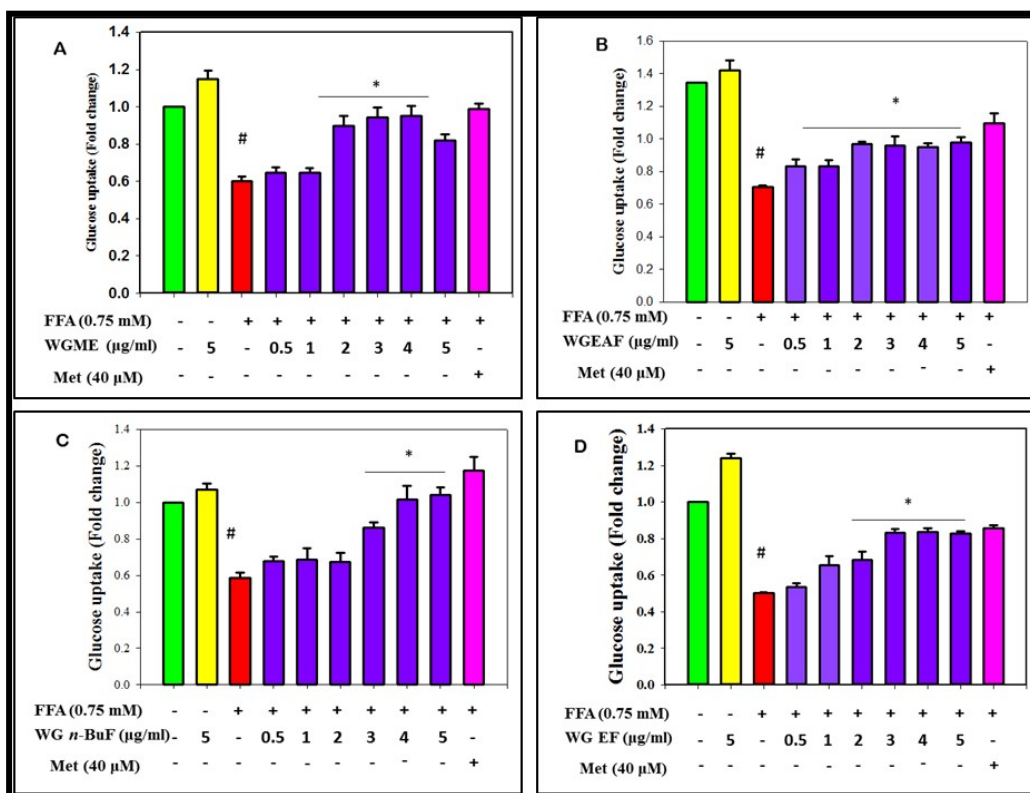

### Supplementary S3 : Spectral data of the isolated compounds 3-6

**Procyanidin A2:** Compound **3**, identified as Procyanidin A2, was isolated as a white powder. The HRMS data showed a deprotonated molecular ion peak  $[M-H]^-$  at 575.19788 and a sodiated peak  $[M+Na]^+$  at 599.11359, corresponding to molecular formula  $C_{30}H_{25}O_{12}$  (exact mass 577.1346).  $^1H$  NMR (600 MHz, MeOH- $D_4$ ) : 4.43 (d, 3.36), 3.66(s), 6.03 (d, 2.28), 6.09(d, 2.28), 6.82(d, 3.12), 6.99(d, 1.86), 7.01(dd, 1.86, 8.28), 4.66(s), 4.08(d, 3.36), 2.80(m), 2.98(m), 6.11(s), 7.04(d, 2.10), 6.84(d, 3.0), 7.03(m).  $^{13}C$  NMR: 101.0, 28.5, 156.5, 152.8, 150.9, 95.0, 96.8, 80.3, 66.6, 105.8.

**Cinnamtannin B-1:** Compound **4** found to be Cinnamtannin B-1. HRMS mass spectral data presents deprotonated  $[M-H]^-$  ion at  $m/z$  value 863.30469 and a  $[M+Na]^+$  ion at 887.17603, referring to the molecular formula  $C_{45}H_{36}O_{18}$  (864.7500 g/mol). UV-vis absorption  $\lambda_{max}$  MeOH at 280 nm.  $^1H$  NMR and  $^{13}C$  NMR data (600 MHz, MeOH- $D_4$ ) . $^1H$  NMR : 3.30(d, 3.42), 4.17(d, 3.35) 5.99(br s), 3.32(d, 2.79), 3.88(br), 4.41 (br s), 4.58 (br s), 5.28 (br s), 5.73 (br s), 5.82 (br s), 5.99(d, 2.24), 6.04(d, 2.21), 6.84(dd, 1.22, 7.58), 6.85(7.59), 6.87 (d, 4.75), 7.13(br s), 7.05(br s), 7.34 (s),  $^{13}C$  NMR : 156.41, 155.35, 154.38, 152.76, 150.41, 149.69, 145.20, 144.88, 144.49, 131.79, 131.05, 130.39, 119.98, 119.19, 115.34, 114.77, 114.39, 107.48, 105.00, 103.59, 102.89, 98.55, 96.92, 95.19, 95.05, 94.66, 78.88, 77.47, 71.18, 66.13, 65.77, 36.90, 28.47, 27.47.

**Rutin:** Compound **5** Rutin, was isolated as a yellow solid. The UV spectrum showed two maxima ( $\lambda_{max}$  MeOH) 256 and 357 nm. HRMS analysis presented  $m/z$  values of deprotonated ion at 609.14697 which predicted the molecular formula  $C_{27}H_{30}O_{16}$ .  $^1H$  NMR: 2.48 (d, 3.10), 3.06-4.36(m), 5.14(d, 2.01), 6.18(d, 0.92), 6.37(d, 0.94), 6.81(d, 1.01), 7.51(m).  $^{13}C$  NMR : 177.01, 164.15, 161.46,

156.01, 148.47, 145.47, 133.46, 121.06, 121.02, 116.43, 115.37, 107.84, 104.34, 101.36, 98.82, 93.82, 100.92, 76.85-67.32 .

**Isoorientin -6"-O-glycoside:** Compound 6, Isolated as yellow solid, showed m/z values in mass spectra as deprotonated molecular ion peak at 595.2200 and sodium adduct ion at 619.1245. UV-Vis absorption spectrum matches with that of isoorientin with  $\lambda_{\max}$  MeOH values 250 nm and 350 nm. <sup>1</sup>H NMR (600 MHz, MeOH-D<sub>4</sub>) <sup>1</sup>H NMR: 7.78(m), 6.91(d, 3.16), 6.89(d, 7.50), 6.42(s), 5.28(d, 7.70), 3.73-3.92 (m). <sup>13</sup>C NMR: 178.28, 162.02, 161.72, 156.96, 148.40, 146.10, 133.75, 121.97, 115.96, 111.711, 101.01, 100.00, 98.32, 93.13, 60.50-78.70 . Spectral data indicate towards the molecular formula C<sub>26</sub>H<sub>28</sub>O<sub>16</sub> with mass 596.5 g/mol.

**Supplementary S4: Behavioural observation of swiss albino mice in WG EFr (2000 mg/kg BW) treated and control group (n=6, 14 days)**

| Observation             | Control group | Test group |
|-------------------------|---------------|------------|
| Lethality               | Not found     | Not found  |
| Convulsions             | Not found     | Not found  |
| Straub tail             | Not found     | Not found  |
| Sedation                | Not found     | Not found  |
| Excitation              | Normal        | Normal     |
| Jumps                   | Not found     | Not found  |
| Loss of balance         | Not found     | Not found  |
| Abnormal writhes        | Not found     | Not found  |
| Piloerection            | Not found     | Not found  |
| Stereotypies            | Not found     | Not found  |
| Head twitches           | Not found     | Not found  |
| Scratching              | Not found     | Not found  |
| Abnormal respiration    | Not found     | Not found  |
| Loss of righting reflex | Not found     | Not found  |
| Loss of corneal reflex  | Not found     | Not found  |
| Defecation              | Normal        | Normal     |
| Salivation              | Normal        | Normal     |
| Lacrimation             | Not found     | Not found  |
| Aggressiveness          | Normal        | Normal     |

**Supplementary S5: Table for body weight and feed consumption of Test animals**

| Group                   | Initial average body weight per group (g) | Final average body weight per group (g) | Average feed consumption per group (g) |
|-------------------------|-------------------------------------------|-----------------------------------------|----------------------------------------|
| <b>Normal control</b>   | 29.54 ± 1.73                              | 29.60 ± 2.98                            | 3.50 ± 0.05                            |
| <b>Diabetic control</b> | 28.80 ± 2.07                              | 32.81 ± 4.04                            | 4.2 ± 0.20                             |
| <b>Positive control</b> | 27.15 ± 1.22                              | 28.78 ± 1.98                            | 3.7 ± 0.09                             |
| <b>EF (10)</b>          | 28.86 ± 2.02                              | 26.18 ± 1.13                            | 3.3 ± 0.07                             |
| <b>EF (25)</b>          | 28.22 ± 1.20                              | 27.33 ± 1.59                            | 3.8 ± 0.12                             |
| <b>EF (50)</b>          | 27.67 ± 1.21                              | 26.30 ± 1.13                            | 3.6 ± 0.02                             |

# Supplimentary S6.Full length blots

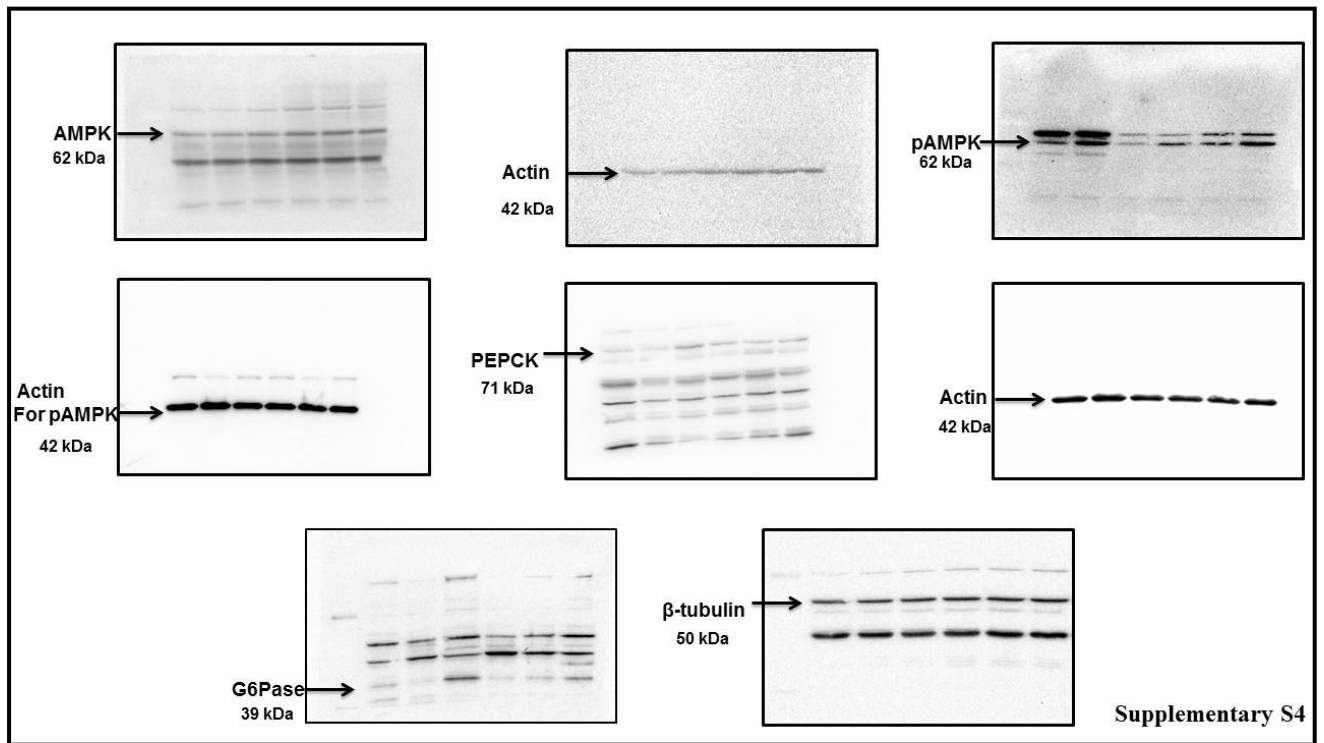

Supplement: d1nj05856h1.pdf [file d1nj05856h1.pdf]
